# Supplementary material for: Defining the variety of cell types in developing and adult human kidneys by single-cell RNA sequencing
Source: PubMed Central journal article supplement (PMC8357940; doi:10.1038/s41536-021-00156-w), 2021-08-11
Supplement: 41536_2021_156_MOESM1_ESM.pdf [file 41536_2021_156_MOESM1_ESM.pdf]

## Supplementary Table 2

|    | Date | First author         | DOI                                                                                                     | Fetal/adult                                       | Embryonic week                                         | Part of kidney digested and analysed                                                                                                                                      | Number of individuals/tissues                               | Number of cells analysed                                                         | Methods                                | Number of clusters                                                                                   |    |
|----|------|----------------------|---------------------------------------------------------------------------------------------------------|---------------------------------------------------|--------------------------------------------------------|---------------------------------------------------------------------------------------------------------------------------------------------------------------------------|-------------------------------------------------------------|----------------------------------------------------------------------------------|----------------------------------------|------------------------------------------------------------------------------------------------------|----|
| 1  | 2018 | Young                | <a href="https://doi.org/10.1126/science.aat1699">https://doi.org/10.1126/science.aat1699</a>           | renal tumor and normal fetal, pediatric and adult | w8,9<br>Adolescent=12 years                            | Fetal = kidneys whole dissociation. Adolescent/adult = where possible separate cortical, medullary, pelvic and ureteric biopsies. Otherwise interface of cortex & medulla | 2 fetuses, 1 adolescent, 1 adult (and more diseased donors) | Adult kidney: 42,809 nonmalignant cells, 37,951 mature. Fetal kidney: 4858       | scRNA seq.                             | Adult: 19. Fetal: 3 nephron clusters, residual = (myo)fibrobl., endo., gangl. Adolescent: not stated |    |
| 2  | 2018 | Menon                | <a href="https://doi.org/10.1242/dev.164038">https://doi.org/10.1242/dev.164038</a>                     | fetal                                             | 87, 105, 110, 115 and 132 days of gestation            | Whole kidney                                                                                                                                                              | 5                                                           | 6414                                                                             | scRNA seq.                             | 11 (8 subclusters within NPCs)                                                                       |    |
| 3  | 2018 | Lindstrom 2          | <a href="https://doi.org/10.1681/ASN.2017080890">https://doi.org/10.1681/ASN.2017080890</a>             | fetal                                             | 13 to 18 (for scRNA seq w16)                           | Nephrogenic zone                                                                                                                                                          | 5 for conventional RNA seq., 1 for scRNA seq.               | scRNA seq: 2750 (318 cells of cluster 4 - NPC)                                   | bulk seq and scRNA seq.                | Initially 12, of which 1 cluster NPC related: this divided into 4 clusters (of scRNA seq)            |    |
| 4  | 2018 | Wang                 | <a href="https://doi.org/10.1016/j.celrep.2018.08.056">https://doi.org/10.1016/j.celrep.2018.08.056</a> | fetal                                             | w7, w8, w9, w10, w13, w19, w22, w24, w25               | w7-10: whole kidney, w15-25: sections                                                                                                                                     | 11 (with 1 biol. Replicate of w7 and w19)                   | 3023 cells of all 11 embryos                                                     | scRNA seq.                             | 13                                                                                                   |    |
| 5  | 2019 | Combes               | <a href="https://doi.org/10.1186/s13073-019-0615-0">https://doi.org/10.1186/s13073-019-0615-0</a>       | fetal                                             | w16                                                    | Did not generate new datasets. Used Lindstrom 2018 dataset and re-analyzed and compared with organoids.                                                                   | nephrogenic zone of 2 fetuses                               | N/A. reanalyzing scRNA seq. data                                                 | N/A. reanalyzing scRNA seq. data       | 16                                                                                                   |    |
| 6  | 2020 | Lindstrom (preprint) | <a href="https://doi.org/10.1101/2020.04.27.060749">https://doi.org/10.1101/2020.04.27.060749</a>       | fetal                                             | week 14                                                | Nephrogenic zone                                                                                                                                                          | 2                                                           | 24,254 cells (mean of 2644 genes/cell)                                           | scRNAseq.                              | 18                                                                                                   |    |
| 7  | 2019 | Stewart              | <a href="https://doi.org/10.1126/science.aat5031">https://doi.org/10.1126/science.aat5031</a>           | fetal + adult                                     | 7-16 PCW                                               | Fetal = whole kidney. Adult = healthy tissue from tumour nephrectomy and healthy donor tissue (cortex, medulla, pelvis, ureter)                                           | unknown                                                     | 40,268 (adult), 27,203 (fetal)                                                   | high-throughput scRNAseq, bulk RNA seq | Adult = 25, fetal = 21                                                                               |    |
| 8  | 2019 | Tran                 | <a href="https://doi.org/10.1016/j.devcel.2019.06.001">https://doi.org/10.1016/j.devcel.2019.06.001</a> | fetal                                             | week 15 and 17 LMP                                     | Vibratome sections, dissected into inner and outer cortex                                                                                                                 | 2                                                           | week 17: 7,518 of zone 1 and 2 together. Week 15: 6,129 of zone 1 and 2 together | scRNA seq.                             | 21                                                                                                   |    |
| 9  | 2019 | Hochane              | <a href="https://doi.org/10.1371/journal.pbio.3000152">https://doi.org/10.1371/journal.pbio.3000152</a> | fetal                                             | w9, w11, w13, w16, w18                                 | Whole kidney                                                                                                                                                              | one kidney per gestational week                             | wk 16 = 6,602/<br>w9+w11+w13+w18 = 11,359                                        | scRNA seq.                             | 22 (29 original clusters, similar ones were merged)                                                  |    |
| 10 | 2018 | Lindstrom 1          | <a href="https://doi.org/10.1016/j.devcel.2018.05.010">https://doi.org/10.1016/j.devcel.2018.05.010</a> | fetal                                             | w8 to 18 (but two replicates of week 17 for scRNA seq) | Nephrogenic zone                                                                                                                                                          | nephrogenic zone of 2 fetuses                               | 7343 cells with 3367 cells of nephrogenic lineage                                | scRNA seq.                             | 22                                                                                                   |    |
| 11 | 2020 | Liao                 | <a href="https://doi.org/10.1038/s41597-019-0351-8">https://doi.org/10.1038/s41597-019-0351-8</a>       | adult                                             | x                                                      | Whole kidney sections (0.5-1g) from nephrectomy (healthy tissues next to tumor)                                                                                           | 3                                                           | 23,366 (of 3 donors together)                                                    | scRNA seq.                             | 10                                                                                                   |    |
| 12 | 2018 | Wu 2                 | <a href="https://doi.org/10.1681/ASN.2018020125">https://doi.org/10.1681/ASN.2018020125</a>             | adult                                             | x                                                      | Allograft biopsy                                                                                                                                                          | single healthy kidney biopsies                              | 4                                                                                | 4259 nuclei, 4487 cells                | scRNA seq.                                                                                           | 16 |
| 13 | 2018 | Wu 1                 | <a href="https://doi.org/10.1016/j.stem.2018.10.010">https://doi.org/10.1016/j.stem.2018.10.010</a>     | adult                                             | x                                                      | Cortex of nephrectomy                                                                                                                                                     | one kidney                                                  | 4,524 nuclei                                                                     | snRNA seq.                             | 17                                                                                                   |    |

|    |      |                               |                                                                                                     |       |   |                                                                   |                             |                                                                                       |                                      |    |
|----|------|-------------------------------|-----------------------------------------------------------------------------------------------------|-------|---|-------------------------------------------------------------------|-----------------------------|---------------------------------------------------------------------------------------|--------------------------------------|----|
| 14 | 2017 | Sivakamasundari<br>(preprint) | <a href="http://dx.doi.org/10.1101/238063">http://dx.doi.org/10.1101/238063</a>                     | adult | x | Kidney resection samples                                          | 3                           | 22,469 (initially 3,128, then<br>19,341 from two donors<br>used for further analysis) | scRNAseq                             | 27 |
| 15 | 2020 | Kuppe                         | <a href="https://doi.org/10.1038/s41586-020-2941-1">https://doi.org/10.1038/s41586-020-2941-1</a>   | adult | x | Healthy tumor nephrectomy tissue                                  | 11 (of which 7 with GFR>60) | 53,672 cells                                                                          | scRNAseq, bulk RNA seq, ATAC<br>seq. | 50 |
| 16 | 2019 | Lake                          | <a href="https://doi.org/10.1038/s41467-019-10861-2">https://doi.org/10.1038/s41467-019-10861-2</a> | adult | x | Nephrectomy samples, partly<br>containing both cortex and medulla | 15                          | 17,659 nuclei                                                                         | snRNA seq.                           | 30 |

Supplementary Table 3

| CELL TYPE           | Hochane fetal                                                                                                                                              | Wang fetal | Lindstrom1 fetal                                                                              | Lindstrom2 fetal                | Young fetal                    | Stewart fetal                                                                             | Menon fetal                                                      | Combes fetal | Tran fetal                 |
|---------------------|------------------------------------------------------------------------------------------------------------------------------------------------------------|------------|-----------------------------------------------------------------------------------------------|---------------------------------|--------------------------------|-------------------------------------------------------------------------------------------|------------------------------------------------------------------|--------------|----------------------------|
| Cap mesenchyme      | N/A                                                                                                                                                        | SIX2       | N/A                                                                                           | N/A                             | SIX2<br>CITED1<br>PAX2<br>SIX1 | SIX2<br>ITGA8<br>MAFB<br>WT1<br>CITED1<br>SALL1<br>PAX2<br>OSR1<br>WNT4<br>BMP7<br>HOXA11 | H19<br>ITGA8<br>NCAM1<br>MEIS2<br>MAFB<br>NR2F2<br>EYA1<br>NTRK2 | N/A          | N/A                        |
| Nephron progenitors | OSR1<br>SIX1<br>SIX2<br>CITED1<br><br>EYA1<br>SALL1<br><br>MEOX1<br>GDNF<br>ETV4<br>COL2A1<br>HES1<br><br>CRABP2<br>LEF1<br>ITGA8<br>LHX1<br>WNT4<br>CCND1 | N/A        | CHRNA1<br>SLC15A1<br>DAPL1<br>TMEM100<br>MEOX1<br>CITED1<br>CRABP2<br>PDK4<br>WASF3<br>MALAT1 | CITED1<br>SIX1<br>LYPD<br>DAPL1 | N/A                            | N/A                                                                                       | N/A                                                              | N/A          | TMEM100<br>CITED1<br>MEOX1 |

|                                                   |     |     |                                            |                                     |     |     |                                       |     |                          |
|---------------------------------------------------|-----|-----|--------------------------------------------|-------------------------------------|-----|-----|---------------------------------------|-----|--------------------------|
| <b>Pretubular aggregate</b>                       |     | N/A | N/A                                        | N/A                                 | N/A | N/A | EYA1<br>JAG1<br>CCND1<br>LHX1<br>EMX2 | N/A | N/A                      |
| <b>Committed/primed nephron progenitor</b>        | N/A | N/A | ID3<br>HEY1<br>LYPD1<br>ID1<br>PAX2<br>ID2 | ID1<br>MEG3<br>DAPL1                | N/A | N/A | N/A                                   | N/A | MAL<br>CLDN10<br>HES1    |
| <b>Proliferating nephron progenitor</b>           | N/A | N/A | HIST1H2AC<br>IGFBP5<br>MFAP4               | CENPF<br>TOP2A                      | N/A | N/A | N/A                                   | N/A | TOP2A<br>SIX1<br>TMEM100 |
| <b>Proliferating committed nephron progenitor</b> | N/A | N/A | N/A                                        | N/A                                 | N/A | N/A | N/A                                   | N/A | PCNA<br>LHX1<br>PAX2     |
| <b>Self-renewing NPC</b>                          | N/A | N/A | N/A                                        | TMEM100<br>CITED1<br>ROBO2<br>MEOX1 | N/A | N/A | N/A                                   | N/A | N/A                      |
| <b>Differentiating NPC</b>                        | N/A | N/A | N/A                                        | CCND1<br>PAX8<br>LHX1               | N/A | N/A | N/A                                   | N/A | N/A                      |

|                                              |                                                       |     |     |     |                       |                                                                                              |                                                 |     |     |
|----------------------------------------------|-------------------------------------------------------|-----|-----|-----|-----------------------|----------------------------------------------------------------------------------------------|-------------------------------------------------|-----|-----|
| <b>Renal vesicle &amp; comma-shaped body</b> | LHX1<br>PAX8<br>JAG1<br>PAX2<br>WNT4<br>SFRP2<br>DLL1 | N/A | N/A | N/A | N/A                   | N/A                                                                                          | N/A                                             | N/A | N/A |
| <b>Proximal renal vesicle</b>                | N/A                                                   | N/A | N/A | N/A | N/A                   | MAFB<br>WT1<br>PAX2<br>FOXC2<br>TMEM100<br>LMX1B<br>NPHS1<br>NPHS2<br>JAG1<br>PAX8<br>NOTCH2 | N/A                                             | N/A | N/A |
| <b>Distal renal vesicle</b>                  | N/A                                                   | N/A | N/A | N/A | N/A                   | LHX1<br>DLL1<br>DKK1<br>FGF8                                                                 | N/A                                             | N/A | N/A |
| <b>Renal vesicle</b>                         | N/A                                                   | N/A | N/A | N/A | PTPRO<br>PODXL<br>WT1 | N/A                                                                                          | LHX1<br>EMX2<br>JAG1<br>DKK1<br>IGFBP4<br>CCND1 | N/A | N/A |

|                                                  |                                                 |     |                                                        |     |     |                                                  |                                                                                                 |     |     |
|--------------------------------------------------|-------------------------------------------------|-----|--------------------------------------------------------|-----|-----|--------------------------------------------------|-------------------------------------------------------------------------------------------------|-----|-----|
| <b>PTA/RV</b>                                    | N/A                                             | N/A | GAD2<br>CCND1<br>KRT8<br>PAX8<br>CXCR4<br>LHX1<br>EMX2 | N/A | N/A | N/A                                              | N/A                                                                                             | N/A | N/A |
| <b>S-shaped body</b>                             | N/A                                             | N/A | N/A                                                    | N/A | N/A | N/A                                              | JAG1<br>CCND1<br>LHX1<br>ADAMTS1<br>POU3F3<br>EMX2<br>SIM2<br>DKK1<br>EPHA7<br>EPHA4<br>PLEKHA1 | N/A | N/A |
| <b>S-shaped body, medial and distal segments</b> | HNF1B<br>POU3F3<br>SIM2<br>SOX9<br>IRX2<br>IRX3 | N/A | N/A                                                    | N/A | N/A | IRX1<br>IRX2<br>HNF1B<br>POU3F3<br>JAG1<br>CCND1 | N/A                                                                                             | N/A | N/A |
| <b>S-shaped body, proximal segment</b>           | CDH6<br>HNF1A<br>AMN                            | N/A | N/A                                                    | N/A | N/A | MAFB<br>WT1<br>FOXC2<br>TMEM100<br>LMX1B         | N/A                                                                                             | N/A | N/A |





|                                          |                                                      |                |                                   |     |                          |                |                                                                                  |     |                       |
|------------------------------------------|------------------------------------------------------|----------------|-----------------------------------|-----|--------------------------|----------------|----------------------------------------------------------------------------------|-----|-----------------------|
| <b>Parietal epithelial cells</b>         | N/A                                                  | N/A            | N/A                               | N/A | N/A                      | N/A            | N/A                                                                              | N/A | LIX1<br>CLDN1<br>CDH6 |
| <b>Loop of Henle</b>                     | N/A                                                  | UMOD<br>POU3F3 | N/A                               | N/A | N/A                      | N/A            | SLC3A1<br>CLDN10<br>KCNJ1<br>ATP1B1<br>FXD2<br>EPA7<br>TBC1D4<br>POU3F3<br>MECOM | N/A | N/A                   |
| <b>(Thick) ascending limb</b>            | N/A                                                  | N/A            | N/A                               | N/A | CLDN16                   | CLDN16<br>UMOD | N/A                                                                              | N/A | N/A                   |
| <b>Descending limb</b>                   | N/A                                                  | N/A            | N/A                               | N/A | SLC12A1                  | SLC12A1        | N/A                                                                              | N/A | N/A                   |
| <b>Distal tubule &amp; loop of Henle</b> | PAPPA2<br>MAL<br>CLCN5<br>SLC12A3<br>UMOD<br>SLC12A1 | N/A            | FXD2<br>SLC12A1<br>MAL<br>ALDH1A1 | N/A | N/A                      | N/A            | SLC12A1<br>UMOD<br>CLCNKB<br>MECOM<br>POU3F3<br>DEFB1 (human)                    | N/A | N/A                   |
| <b>Distal tubule</b>                     | N/A                                                  | CLCNKB         | N/A                               | N/A | AVPR2<br>SLC8A1<br>KCNJ1 | SLC12A3        | FXD2<br>CA2<br>MAL<br>TBC1D4<br>DEFB1 (human)<br>POU3F3<br>MECOM                 | N/A | N/A                   |
| <b>Distal precursor</b>                  | N/A                                                  | N/A            | LIMCH1<br>MECOM<br>MAL<br>SOX9    | N/A | N/A                      | N/A            | N/A                                                                              | N/A | N/A                   |

|                                 |                                                               |              |                                       |     |                               |                                                                                               |                                                                      |     |                           |
|---------------------------------|---------------------------------------------------------------|--------------|---------------------------------------|-----|-------------------------------|-----------------------------------------------------------------------------------------------|----------------------------------------------------------------------|-----|---------------------------|
| <b>Early proximal tubule</b>    | LRP2<br>ANPEP<br>SLC34A1<br>CLDN1<br>CLDN2<br>SLC13A1<br>CUBN | N/A          | N/A                                   | N/A | N/A                           | N/A                                                                                           | N/A                                                                  | N/A | N/A                       |
| <b>Proximal precursor</b>       | N/A                                                           | N/A          | IGFB7<br>JAG1<br>CDH6<br>TPSAN12      | N/A | N/A                           | N/A                                                                                           | N/A                                                                  | N/A | N/A                       |
| <b>Proximal tubule</b>          | N/A                                                           | LRP2<br>CUBN | C19orf77<br>CUBN<br>SLC3A1<br>GLYATL1 | N/A | SLC13A3<br>SLC34A1            | FAM151A<br>SLC22A8<br>ALDOB<br>GLYAT<br>SLC13A1<br>DPEP1<br>HNF1A<br>HNF4A<br>HNF4G<br>SLC5A2 | SLC3A1<br>CUBN<br>PDZK1<br>LRP2<br>CA2<br>FXVD2<br>ATP1B1<br>ADAMTS1 | N/A | SLC3A1<br>LGALS2<br>APOA1 |
| <b>Distinct proximal tubule</b> | N/A                                                           | N/A          | N/A                                   | N/A | N/A                           | VACM1                                                                                         | N/A                                                                  | N/A | N/A                       |
| <b>Proximal straight tubule</b> | N/A                                                           | N/A          | N/A                                   | N/A | SLC7A13<br>SLC16A9<br>SLC22A7 | N/A                                                                                           | N/A                                                                  | N/A | N/A                       |
| <b>Proximal distal tubule</b>   | N/A                                                           | N/A          | N/A                                   | N/A | SLC17A3<br>SLC22A8            | N/A                                                                                           | N/A                                                                  | N/A | N/A                       |
| <b>Connecting tubule</b>        | ALDH1A1<br>TACSTD2<br>CDH1                                    | N/A          | N/A                                   | N/A | N/A                           | CALB1                                                                                         | ATP6V1B1<br>FXVD2<br>MECOM<br>TBC1D4<br>PLEKHA1                      | N/A | N/A                       |

|                                         |                                                            |                          |     |                                                                                                                               |                          |                                                    |                                                                        |     |                                                                                                                 |
|-----------------------------------------|------------------------------------------------------------|--------------------------|-----|-------------------------------------------------------------------------------------------------------------------------------|--------------------------|----------------------------------------------------|------------------------------------------------------------------------|-----|-----------------------------------------------------------------------------------------------------------------|
| <b>Interstitial progenitor cells</b>    | GDNF<br>FOXD1                                              | N/A                      | N/A | N/A                                                                                                                           | N/A                      | FOXD1<br>PBX1<br>PDGFRA                            | N/A                                                                    | N/A | N/A                                                                                                             |
| <b>Proliferating interstitial cells</b> | N/A                                                        | N/A                      | N/A | N/A                                                                                                                           | N/A                      | N/A                                                | N/A                                                                    | N/A | TOP2A<br>COL1A2<br>PCNA                                                                                         |
| <b>Interstitial cells</b>               | DES<br>COL3A1<br>COL1A1<br>SERPINE2<br>FGF7<br>DCN<br>LEF1 | SFRP1<br>MEIS1<br>PDGFRA | N/A | SULTEI1<br>TCF21<br>ALDH1A2<br>VCAM1<br>FABP2<br>ANGPT1<br>LUM<br>SFRP2<br>DCN<br>MEIS1<br>TAGLN<br>POSTN<br>REN MGP<br>GATA3 | N/A                      | N/A                                                | COL1A2<br>COL3A1<br>TNC<br>COL6A3<br>LGALS1<br>MAFB<br>NR2F2<br>IGFBP4 | N/A | COL1A2<br>PDGFRA<br>COL1A1<br>SULT1E1<br>OLFM3<br>ANGPT1<br>PBX1<br>MEIS2<br>COL8A1<br>GUCY1A3<br>TGFB1<br>ZEB2 |
| <b>Fibroblast</b>                       | N/A                                                        | N/A                      | N/A | N/A                                                                                                                           | SFRP2<br>EMILIN1<br>MMP2 | LUM<br>TNC<br>COL1A1<br>COL3A1<br>COL1A2<br>COL1A1 | N/A                                                                    | N/A | N/A                                                                                                             |
| <b>Myofibroblast</b>                    | N/A                                                        | N/A                      | N/A | N/A                                                                                                                           | PDGFRB<br>ACTA2          | PDGFRB                                             | N/A                                                                    | N/A | N/A                                                                                                             |
| <b>Mesangial cells</b>                  | ACTA2<br>TPM2<br>PDGFRB<br>MCAM<br>CSPG4<br>CD248          | N/A                      | N/A | N/A                                                                                                                           | N/A                      | N/A                                                | LGALS1                                                                 | N/A | TMEFF1<br>GATA3<br>COL4A1                                                                                       |

|                                           |                                                                 |             |     |     |                                                    |                                                                                                                         |                                                                                                                                         |     |                          |
|-------------------------------------------|-----------------------------------------------------------------|-------------|-----|-----|----------------------------------------------------|-------------------------------------------------------------------------------------------------------------------------|-----------------------------------------------------------------------------------------------------------------------------------------|-----|--------------------------|
| <b>Collecting duct &amp; Ureteric Bud</b> | KRT18<br>KRT8<br>RET<br>CLDN7<br>AQP2<br>GATA2<br>MMP7<br>CALB1 | QP2<br>AQP3 | N/A | N/A | N/A                                                | N/A                                                                                                                     | N/A                                                                                                                                     | N/A | N/A                      |
| <b>Uteric bud</b>                         | N/A                                                             | N/A         | N/A | N/A | RET<br>GATA3<br>ELF3<br>POU3F3<br>TFCP2L1<br>CDH16 | HNF1B<br>GATA3<br>RET<br>WNT9B<br>SOX8<br>SOX9<br>GFRA1<br>WNT11<br>ELF3<br>POU3F3<br>TCFP2L1<br>CDH16<br>KRT8<br>KRT19 | N/A                                                                                                                                     | N/A | ALDH1A1<br>RET<br>CRABP1 |
| <b>Collecting duct</b>                    | N/A                                                             | N/A         | N/A | N/A | ATP6V0D2<br>CLCNKB<br>CLDN8                        | PVALB<br>CLNK<br>TMEM213<br>CLCNKA<br>CLCNKB<br>KRT8<br>KRT19                                                           | KCNJ1<br>GATA3<br>ELF5<br>STC1<br>TBX3<br>CLDN4<br>ATP6V1B1<br>MAL<br>POU3F3<br>TBC1D4<br>KNG1 (rat)<br>CA2<br>DEFB1 (human)<br>PLEKHA1 | N/A | KRT18<br>AQP2<br>CALB1   |
| <b>Intermedullary collecting duct</b>     | N/A                                                             | N/A         | N/A | N/A | N/A                                                | SLC14A2                                                                                                                 | N/A                                                                                                                                     | N/A | N/A                      |

|                                                       |                                      |     |     |                        |                                                           |                         |                                               |     |                        |
|-------------------------------------------------------|--------------------------------------|-----|-----|------------------------|-----------------------------------------------------------|-------------------------|-----------------------------------------------|-----|------------------------|
| <b>Intercalated cells</b>                             | N/A                                  | N/A | N/A | N/A                    | N/A                                                       | FOXI1                   | TMEM213 (human)                               | N/A | N/A                    |
| <b>Intercalated cell type A</b>                       | N/A                                  | N/A | N/A | N/A                    | SLC4A1                                                    | N/A                     | SLC4A1                                        | N/A | N/A                    |
| <b>Intercalated cell type B</b>                       | N/A                                  | N/A | N/A | N/A                    | SLC26A4                                                   | N/A                     | SLC26A4                                       | N/A | N/A                    |
| <b>Principal cells</b>                                | N/A                                  | N/A | N/A | N/A                    | AQP2                                                      | AQP2<br>AQP3            | N/A                                           | N/A | N/A                    |
| <b>Macula densa</b>                                   | N/A                                  | N/A | N/A | N/A                    | N/A                                                       | PTGS2                   | N/A                                           | N/A | N/A                    |
| <b>Pelvic epithelium</b>                              | N/A                                  | N/A | N/A | N/A                    | KRT23<br>SAA2                                             | SAA2                    | N/A                                           | N/A | N/A                    |
| <b>Transitional epithelium of ureter (urothelium)</b> | N/A                                  | N/A | N/A | N/A                    | N/A                                                       | UPK1A<br>UPK1B          | N/A                                           | N/A | N/A                    |
| <b>Pelvis &amp; ureter</b>                            | N/A                                  | N/A | N/A | N/A                    | TP63<br>PVRL4<br>KRT5<br>UPK1B<br>UPK1A<br>DHRS2<br>S100P | UPK3A<br>S100P<br>DHRS2 | N/A                                           | N/A | N/A                    |
| <b>Endothelial cells</b>                              | KDR<br>TEK<br>FLT1<br>CDH5<br>PECAM1 | N/A | N/A | PLVAP<br>GNG11<br>TIE1 | N/A                                                       | PECAM1                  | ADGRL4<br>ADGRF5<br>NOSTRIN<br>PECAM1<br>CD34 | N/A | PLVAP<br>VAMP5<br>EMCN |
| <b>Fenestrated endothelium</b>                        | N/A                                  | N/A | N/A | N/A                    | N/A                                                       | PLVAP                   | N/A                                           | N/A | N/A                    |
| <b>Non-fenestrated vasa recta</b>                     | N/A                                  | N/A | N/A | N/A                    | N/A                                                       | SLC14A1                 | N/A                                           | N/A | N/A                    |
| <b>Glomerular vasculature</b>                         | N/A                                  | N/A | N/A | N/A                    | CLDN5<br>SEMA3G<br>AQP1                                   | N/A                     | N/A                                           | N/A | N/A                    |

|                            |                                        |     |                                                  |                          |                                                     |     |                                                                                          |     |                      |
|----------------------------|----------------------------------------|-----|--------------------------------------------------|--------------------------|-----------------------------------------------------|-----|------------------------------------------------------------------------------------------|-----|----------------------|
| <b>Vascular</b>            | N/A                                    | N/A | N/A                                              | N/A                      | PLVAP<br>SLC14A1<br>VCAM1<br>KDR<br>PTPRB<br>PECAM1 | N/A | N/A                                                                                      | N/A | N/A                  |
| <b>Leukocytes</b>          | CD37<br>CD48<br>ITGB2<br>IFI30<br>IL1B | N/A | N/A                                              | N/A                      | N/A                                                 | N/A | N/A                                                                                      | N/A | N/A                  |
| <b>Immune cells</b>        | N/A                                    | N/A | N/A                                              | HLA-DRA<br>CCLN3<br>SRGN | N/A                                                 | N/A | N/A                                                                                      | N/A | LYZ<br>PTPRC<br>IL1B |
| <b>Erythrocytes</b>        | N/A                                    | N/A | N/A                                              | N/A                      | N/A                                                 | N/A | MTCO1P12<br>MTND1P23<br>RPL10P9<br>HBG2<br>HBA2<br>HEMGN<br>AHSP<br>ALAS2<br>HBG1<br>HBB | N/A | HBM<br>HBB<br>HBA1   |
| <b>Hematopoietic cells</b> | N/A                                    | N/A | N/A                                              | N/A                      | N/A                                                 | N/A | LST1<br>HLA-DPA1<br>SRGN<br>MINDA<br>CORO1A                                              | N/A | N/A                  |
| <b>Blood cells</b>         | N/A                                    | N/A | N/A                                              | N/A                      | N/A                                                 | N/A | N/A                                                                                      | N/A | N/A                  |
| <b>Proliferating cell</b>  | N/A                                    | N/A | HIST1H4C<br>NUSAP1<br>KIAA0101<br>UBE2C<br>CENPF | HIST1H4C<br>HIST1H1A     | N/A                                                 | N/A | HIST1H1A<br>HIST1H1B<br>HIST1H1C<br>HIST1H1D<br>HIST1H1E                                 | N/A | N/A                  |
